# Supplementary material for: Neutrophil Activation/Maturation Markers in Chronic Heart Failure with Reduced Ejection Fraction
Source: MDPI journal article supplement (doi:10.3390/diagnostics12020444), 2022-02-09
Supplement: s1 [file s1]

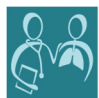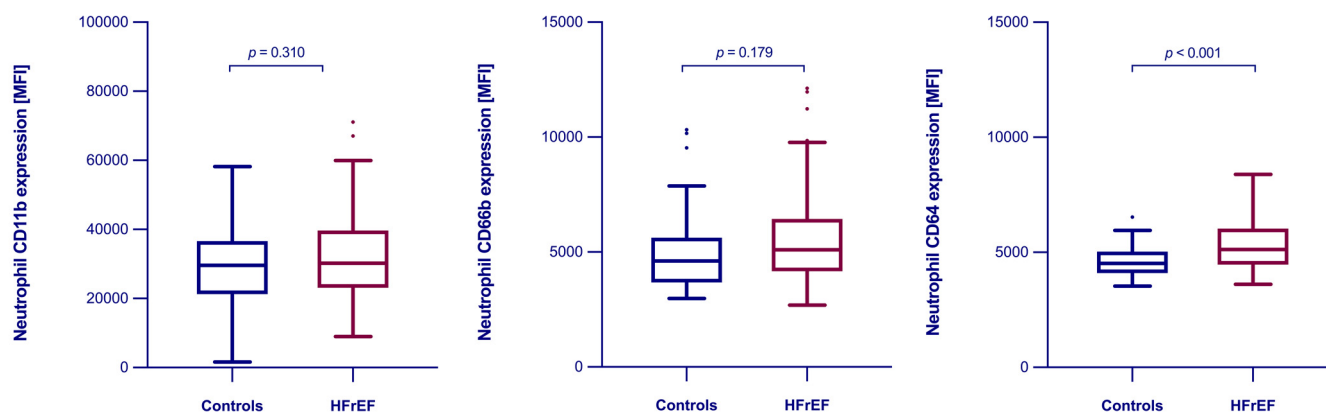

**Figure S1.** Neutrophil CD11b, CD66b and CD64 expression in controls and in patients with heart failure with reduced ejection fraction (HFrEF). Comparison between groups has been assessed by the Mann-Whitney-U test.
